# Supplementary material for: Common eating habit patterns are associated with a high maximum occlusal force and pre-eating cardiac vagal tone
Source: PeerJ journal article supplement (doi:10.7717/peerj.15091), 2023-03-23

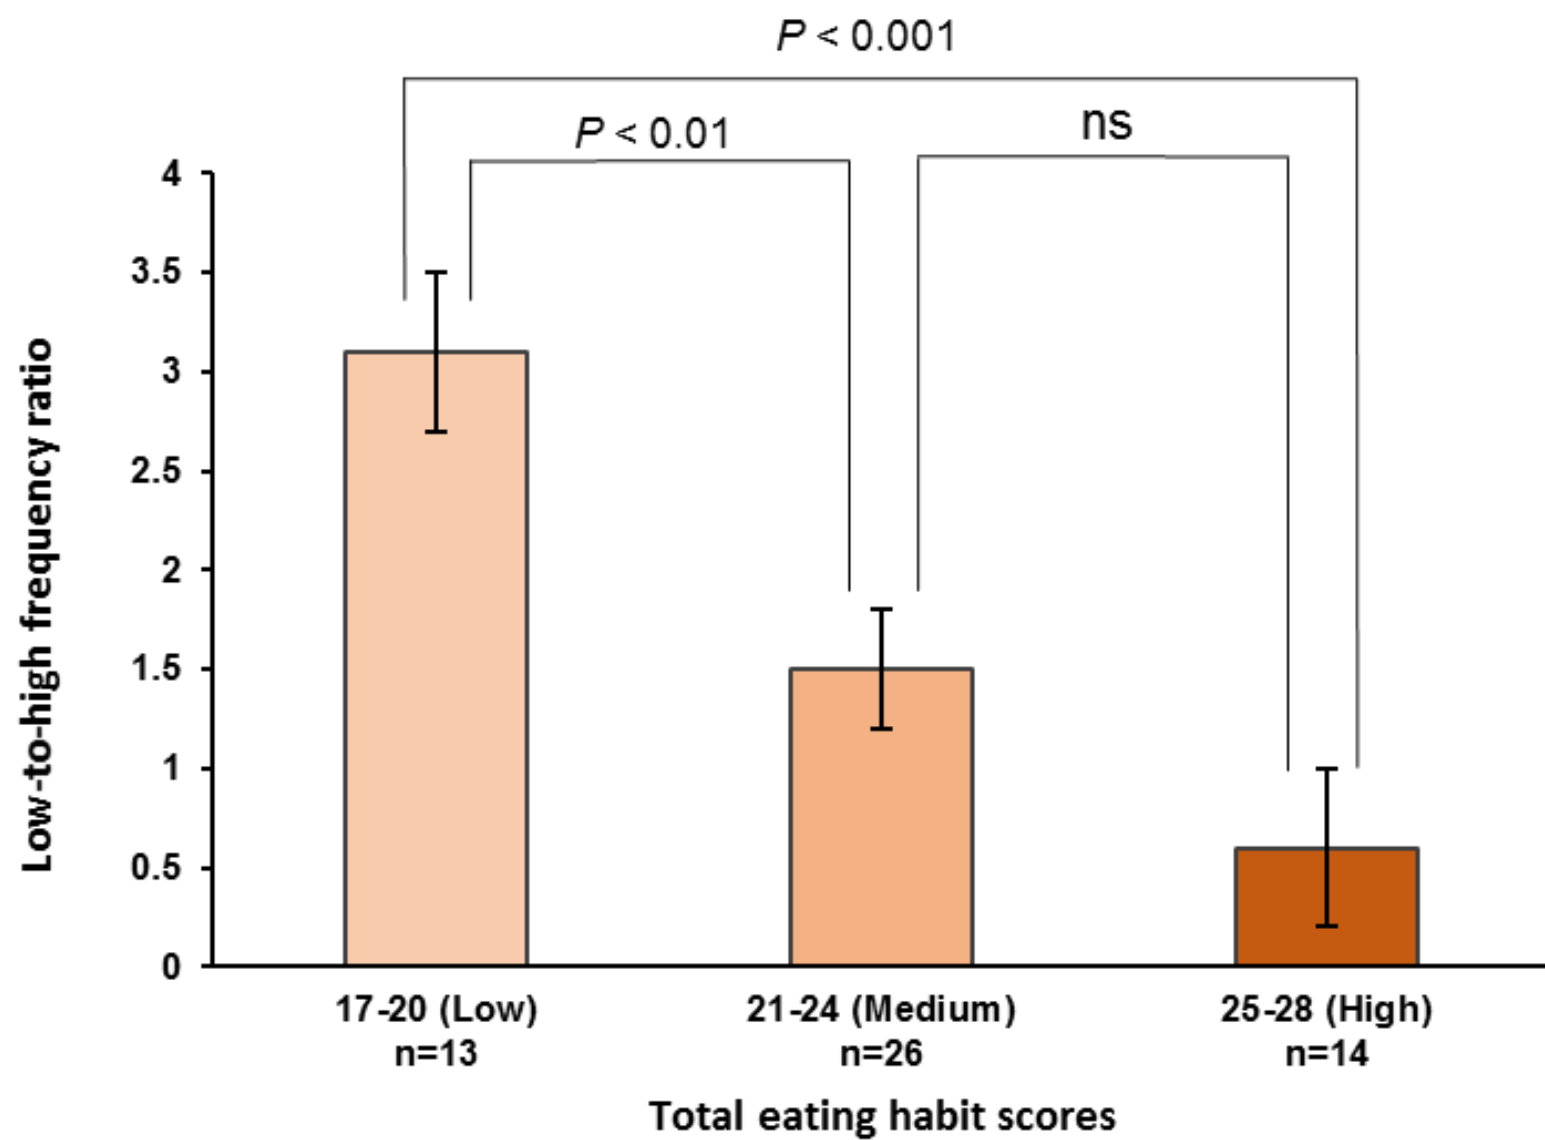

Supplement: Fig_S3.pdf [file Fig_S3.pdf]
