# Supplementary material for: Common eating habit patterns are associated with a high maximum occlusal force and pre-eating cardiac vagal tone
Source: PeerJ journal article supplement (doi:10.7717/peerj.15091), 2023-03-23
Supplement: Supplemental_file_S1.pdf [file Supplemental_file_S1.pdf]

## Eating Habit Questionnaire

| Eating habit item                                  | Question                                                      | Answers                                                                                                                               |
|----------------------------------------------------|---------------------------------------------------------------|---------------------------------------------------------------------------------------------------------------------------------------|
| 1. Breakfast habits                                | Are you in the habit of eating breakfast?                     | <input type="checkbox"/> Skip sometimes <input type="checkbox"/> Every day                                                            |
| 2. Always eat at a fixed time                      | Do you usually eat at fixed times?                            | <input type="checkbox"/> Yes <input type="checkbox"/> No                                                                              |
| 3. Number of meals per day (including snacks)      | How many meals do you eat a day (including snacks)?           | <input type="text"/> meals/day                                                                                                        |
| 4. Amount eaten                                    | How much food do you usually eat?                             | <input type="checkbox"/> Small <input type="checkbox"/> Medium <input type="checkbox"/> Large                                         |
| 5. Eating speed                                    | How quickly do you eat?                                       | <input type="checkbox"/> Slow <input type="checkbox"/> Fast                                                                           |
| 6. Chew food well                                  | Do you chew your food well?                                   | <input type="checkbox"/> Yes <input type="checkbox"/> No                                                                              |
| 7. Eat until full                                  | Do you eat until you are full?                                | <input type="checkbox"/> Yes <input type="checkbox"/> No                                                                              |
| 8. Think about the nutritional balance of the meal | Do you pay attention to the nutritional balance of your meal? | <input type="checkbox"/> Yes <input type="checkbox"/> No                                                                              |
| 9. Many likes and dislikes                         | Do you have many food likes and dislikes?                     | <input type="checkbox"/> Yes <input type="checkbox"/> No                                                                              |
| 10. Eat for stress relief                          | Does eating relieve your stress?                              | <input type="checkbox"/> Yes <input type="checkbox"/> No                                                                              |
| 11. Eat with others or alone (including family)    | Are you always with someone when you eat (including family)?  | <input type="checkbox"/> Alone <input type="checkbox"/> Sometimes eat with others <input type="checkbox"/> Always eat with others     |
| 12. Conversation when eating                       | Do you have a conversation when eating?                       | <input type="checkbox"/> No conversation <input type="checkbox"/> Sometimes conversation <input type="checkbox"/> Always conversation |
