# Supplementary material for: Common eating habit patterns are associated with a high maximum occlusal force and pre-eating cardiac vagal tone
Source: PeerJ journal article supplement (doi:10.7717/peerj.15091), 2023-03-23
Supplement: Supplemental_file_S1_(Japanese_version).pdf [file Supplemental_file_S1_%28Japanese_version%29.pdf]

食事習慣質問票

| 食事習慣項目               | 質問                              | 回答                                                                                                   |
|----------------------|---------------------------------|------------------------------------------------------------------------------------------------------|
| 1. 朝食習慣              | 朝食を食べる習慣はありますか？                 | <input type="checkbox"/> 時々食べない <input type="checkbox"/> いつも食べる                                      |
| 2. 食事をする時間           | あなたはいつも決まった時間に食事をしますか？          | <input type="checkbox"/> はい <input type="checkbox"/> いいえ                                             |
| 3. 食事回数(間食を含む)       | 一日何回食事をしますか(間食を含む)？             | <input type="text"/> 回/一日                                                                            |
| 4. 食事の量              | あなたの食事量はどれくらいですか？               | <input type="checkbox"/> 少ない <input type="checkbox"/> 中程度 <input type="checkbox"/> 多い                |
| 5. 食事の速さ             | 食べる速さはどれくらいですか？                 | <input type="checkbox"/> 遅い <input type="checkbox"/> 速い                                              |
| 6. 咀嚼の度合い            | あなたは、食べ物をよく噛んで食べますか？            | <input type="checkbox"/> はい <input type="checkbox"/> いいえ                                             |
| 7. 食事における満腹度合い       | あなたは、お腹いっぱいになるまで食べますか？          | <input type="checkbox"/> はい <input type="checkbox"/> いいえ                                             |
| 8. 食事の栄養バランス思考       | 食事の栄養バランスに気をつけますか？              | <input type="checkbox"/> はい <input type="checkbox"/> いいえ                                             |
| 9. 食べ物の好き嫌い          | 食べ物の好き嫌いは多いですか？                 | <input type="checkbox"/> はい <input type="checkbox"/> いいえ                                             |
| 10. 食事でのストレス解消       | 食べることでストレスが解消しますか？              | <input type="checkbox"/> はい <input type="checkbox"/> いいえ                                             |
| 11. 集団で食事及び孤食(家族を含む) | 食事をするときは、いつも誰かと一緒に食べますか(家族を含む)？ | <input type="checkbox"/> 一人で食べる <input type="checkbox"/> 時々誰かと食べる <input type="checkbox"/> いつも誰かと食べる |
| 12. 食事時の会話           | 食事中に会話をしますか？                    | <input type="checkbox"/> 会話をしない <input type="checkbox"/> 時々会話をする <input type="checkbox"/> いつも会話をする   |
